# Supplementary material for: Characteristics and Relationships between Total Polyphenol and Flavonoid Contents, Antioxidant Capacities, and the Content of Caffeine, Gallic Acid, and Major Catechins in Wild/Ancient and Cultivated Teas in Vietnam
Source: MDPI journal article supplement (doi:10.3390/molecules28083470), 2023-04-14
Supplement: s1 [file s1]

**Table S1.** Tea sample coding and their origins.

| Sample code | Tea type   | Geographic origin                                                               | GPS coordinates                                               | Production date | Tea leaf grading                |
|-------------|------------|---------------------------------------------------------------------------------|---------------------------------------------------------------|-----------------|---------------------------------|
| DL-G-01     | Green tea  | Da Lat city<br>(Lam Dong Province)<br>Central highlands<br>South of Vietnam     | 11°52'39.0"N<br>108°33'40.5"<br>E<br>11.877487,<br>108.561258 | 12/2020         | 1 bud + 2 leaves (old tea tree) |
| DL-G-02     |            |                                                                                 |                                                               | 06/2022         | 1 bud + 2 leaves (old tea tree) |
| DL-G-03     |            |                                                                                 |                                                               | 10/2020         | 1 bud + 2-3 leaves              |
| DL-G-04     |            |                                                                                 |                                                               | 06/2022         | 1 bud + 2-3 leaves              |
| DL-O-01     | Oolong tea | Central highlands<br>South of Vietnam                                           | 11.877487,<br>108.561258                                      | 06/2021         | 1 bud + 2-3 leaves              |
| DL-O-02     |            |                                                                                 |                                                               | 12/2020         | 1 bud + 2-3 leaves              |
| DL-O-03     |            |                                                                                 |                                                               | 10/2021         | 1 bud + 2-3 leaves              |
| DL-O-04     |            |                                                                                 |                                                               | 06/2022         | 1 bud + 2-3 leaves              |
| DL-O-06     |            |                                                                                 |                                                               | 06/2021         | 1 bud + 2-3 leaves              |
| DL-O-08     |            |                                                                                 |                                                               | 06/2022         | 1 bud + 2-3 leaves              |
| LH-O-01     |            |                                                                                 |                                                               | 10/2020         | 1 bud + 2-3 leaves              |
| LH-O-02     |            |                                                                                 |                                                               | 04/2021         | 1 bud + 2-3 leaves              |
| LH-O-03     | Oolong tea | Lam Ha district<br>(Lam Dong Province)<br>Central highlands<br>South of Vietnam | 11°47'21.5"N<br>108°09'49.9"<br>E<br>11.789306,<br>108.163849 | 06/2021         | 1 bud + 2-3 leaves              |
| LH-O-05     |            |                                                                                 |                                                               | 12/2020         | 1 bud + 2-3 leaves              |
| LH-O-06     |            |                                                                                 |                                                               | 04/2021         | 1 bud + 2-3 leaves              |
| LH-O-07     |            |                                                                                 |                                                               | 06/2021         | 1 bud + 2-3 leaves              |
| LH-O-08     |            |                                                                                 |                                                               | 09/2021         | 1 bud + 2-3 leaves              |
| SG-G-01     | Green tea  | Suoi Giang<br>commune (Yen Bai Province)<br>North of Vietnam                    | 21°37'33.7"N<br>104°36'53.3"<br>E<br>21.626020,<br>104.614804 | 11/2020         | 1 bud                           |
| SG-G-02     |            |                                                                                 |                                                               | 06/2021         | 1 bud                           |
| SG-G-03     |            |                                                                                 |                                                               | 07/2022         | 1 bud                           |
| SG-G-04     |            |                                                                                 |                                                               | 11/2020         | 1 bud + 1 leaf                  |
| SG-G-05     |            |                                                                                 |                                                               | 04/2021         | 1 bud + 1 leaf                  |
| SG-G-06     |            |                                                                                 |                                                               | 07/2022         | 1 bud + 1 leaf                  |
| SG-G-07     |            |                                                                                 |                                                               | 11/2020         | 1 bud + 2 leaves                |
| SG-P-01     |            |                                                                                 |                                                               | Raw             | 09/2020                         |
| SG-P-02     | Pu'erh tea |                                                                                 |                                                               | 10/2020         | 1 bud + 1 leaf                  |
| SG-B-01     | Black tea  |                                                                                 |                                                               | 10/2020         | 1 bud + 2 leaves                |
| SG-B-02     |            |                                                                                 |                                                               | 06/2021         | 1 bud + 2 leaves                |
| SG-B-03     |            |                                                                                 |                                                               | 04/2022         | 1 bud + 2 leaves                |

**Table S2.** The mass spectrometry conditions for analysing caffeine, gallic acid and catechins by UPLC-MS/MS

| Compound | ES mode | Precursor ion (m/z) | Product ion (m/z) | Cone (V) | Collision (V) |
|----------|---------|---------------------|-------------------|----------|---------------|
| GA       | (-)     | 168.95              | 78.95 (C)         | 35.0     | 20.0          |
|          |         | 168.95              | 125.00 (Q)        | 35.0     | 15.0          |
| CFI      | (+)     | 195.02              | 110.00 (C)        | 40.0     | 25.0          |
|          |         | 195.02              | 138.02 (Q)        | 40.0     | 20.0          |
| EC       | (-)     | 288.95              | 203.00 (C)        | 40.0     | 20.0          |
|          |         | 288.95              | 245.00 (Q)        | 40.0     | 15.0          |
| C        | (-)     | 289.00              | 203.00 (C)        | 40.0     | 20.0          |
|          |         | 289.00              | 245.05 (Q)        | 40.0     | 15.0          |
| EGC      | (-)     | 305.00              | 125.00 (Q)        | 40.0     | 25.0          |
|          |         | 305.00              | 179.00 (C)        | 40.0     | 15.0          |
| ECG      | (-)     | 440.95              | 168.95 (C)        | 35.0     | 20.0          |
|          |         | 440.95              | 289.05 (Q)        | 35.0     | 20.0          |
| EGCG     | (-)     | 457.00              | 125.00 (C)        | 35.0     | 40.0          |
|          |         | 457.00              | 168.95 (Q)        | 35.0     | 17.0          |

C: confirmation m/z; Q: quantitation m/z

**Table S3.** Parameters of regression equations.

| Criteria                        | Results                                                                                                         |
|---------------------------------|-----------------------------------------------------------------------------------------------------------------|
| TPCs                            | Working range: 10-70 (mg GAE L <sup>-1</sup> )<br>$y = 0.0117x + 0.0221$ , $R^2 = 0.99946$ , Bias: 0.13-4.96%   |
| TFCs                            | Working range: 50-700 (mg QE L <sup>-1</sup> )<br>$y = 0.0013x + 0.1454$ , $R^2 = 0.9980$ , Bias: 0.09-8.48%    |
| DPPH                            | Working range: 100-700 (μmol TE L <sup>-1</sup> )<br>$y = 0.0011x + 0.0174$ , $R^2 = 0.9991$ , Bias: 0.06-9.49% |
| ABTS                            | Working range: 100-700 (μmol TE L <sup>-1</sup> )<br>$y = 0.0009x - 0.0111$ , $R^2 = 0.9985$ , Bias: 0.2-10.45% |
| FRAP                            | Working range: 100-700 (μmol TE L <sup>-1</sup> )<br>$y = 0.0011x + 0.0113$ , $R^2 = 0.9982$ , Bias: 0.01-14.2% |
| CUPRAC                          | Working range: 100-700 (μmol TE L <sup>-1</sup> )<br>$y = 0.0011x + 0.0127$ , $R^2 = 0.9979$ , Bias: 0.42-9.55% |
| Caffeine (CFI)                  | Working range: 1-40 (mg L <sup>-1</sup> )<br>$y = 1401x - 287300$ , $R^2 = 0.9996$                              |
| Gallic acid (GA)                | Working range: 5-500 (μg L <sup>-1</sup> )<br>$y = 382.5x - 379$ , $R^2 = 0.9991$                               |
| Catechin (C)                    | Working range: 0.5-20 (mg L <sup>-1</sup> )<br>$y = 94.09x - 6778$ , $R^2 = 0.9990$                             |
| Epicatechin (EC)                | Working range: 0.5-30 (mg L <sup>-1</sup> )<br>$y = 64.81x - 6810$ , $R^2 = 0.9995$                             |
| Epicatechin gallate (ECG)       | Working range: 0.5-30 (mg L <sup>-1</sup> )<br>$y = 185.1x - 23860$ , $R^2 = 0.9993$                            |
| Epigallocatechin (EGC)          | Working range: 0.5-20 (mg L <sup>-1</sup> )<br>$y = 56.87x - 2303$ , $R^2 = 0.9990$                             |
| Epigallocatechin gallate (EGCG) | Working range: 5-50 (mg L <sup>-1</sup> )<br>$y = 199.6x - 23540$ , $R^2 = 0.9997$                              |

**Table S4.** LODs and LOQs.

|        | LOD  | LOQ  |      | LOD (μg L <sup>-1</sup> ) | LOQ (μg L <sup>-1</sup> ) |
|--------|------|------|------|---------------------------|---------------------------|
| TPCs   | 0.81 | 2.7  | CFI  | 0.83                      | 2.8                       |
| TFCs   | 5.1  | 15.6 | GA   | 0.37                      | 1.2                       |
| DPPH   | 16.3 | 49.5 | C    | 0.48                      | 1.6                       |
| ABTS   | 12.3 | 37.3 | EC   | 0.58                      | 1.9                       |
| FRAP   | 9.9  | 30.1 | EGC  | 0.8                       | 2.7                       |
| CUPRAC | 11.8 | 35.7 | ECG  | 0.72                      | 2.4                       |
|        |      |      | EGCG | 0.86                      | 2.9                       |

**Table S5.** Repeatability and reproducibility.

|        | <b>RSD<sub>r</sub> (%)</b> | <b>RSD<sub>R</sub> (%)</b> |
|--------|----------------------------|----------------------------|
| TPCs   | 0.79                       | 1.23                       |
| TFCs   | 1.14                       | 1.31                       |
| DPPH   | 1.5                        | 1.63                       |
| ABTS   | 1.37                       | 1.48                       |
| FRAP   | 1.03                       | 1.26                       |
| CUPRAC | 1.52                       | 1.55                       |
| CFI    | 1.4-1.7                    | 1.4-1.7                    |
| GA     | 1.1-1.6                    | 1.2-1.7                    |
| C      | 1.4-2.0                    | 1.4-2.0                    |
| EC     | 0.90-1.6                   | 0.96-1.6                   |
| EGC    | 0.39-1.7                   | 0.39-1.7                   |
| ECG    | 0.69-1.9                   | 0.69-1.9                   |
| EGCG   | 1.1-1.7                    | 1.1-1.7                    |

**Table S6.** Recovery test.

|        | <b>Spiked</b> |           |              |
|--------|---------------|-----------|--------------|
|        | <b>0.5Cx</b>  | <b>Cx</b> | <b>1.5Cx</b> |
| TPCs   | 98.9          | 99.4      | 98.8         |
| TFCs   | 98.2-101      | 99.1-99.8 | 98.5-101     |
| DPPH   | 98.0-99.5     | 98.6-99.4 | 99.3-100     |
| ABTS   | 99.3-99.6     | 98.7-99.8 | 99.7-101     |
| FRAP   | 98.7-98.9     | 99.6-100  | 99.1-99.9    |
| CUPRAC | 98.0-100      | 98.5-99.5 | 98.9-99.6    |
| CFI    |               | 100       |              |
| GA     |               | 93.8      |              |
| C      |               | 94.3      |              |
| EC     |               | 99.9      |              |
| EGC    |               | 98.8      |              |
| ECG    |               | 98        |              |
| EGCG   |               | 97.1      |              |
